# Supplementary material
Source: MDPI journal article supplement (https://www.mdpi.com/2073-4468/12/2/34)
Supplement: s1 [file s1]

|                                                                                                               |                                                                                                                                                                                                 |
|---------------------------------------------------------------------------------------------------------------|-------------------------------------------------------------------------------------------------------------------------------------------------------------------------------------------------|
| <b>Table S1A: Suitability of patients for outpatient unit</b>                                                 |                                                                                                                                                                                                 |
| 1                                                                                                             | Patients with psychiatric symptoms and syndromes and the detection of autoantibodies in serum and/or cerebrospinal fluid                                                                        |
| 2                                                                                                             | Patients with subacute onset of psychiatric symptoms and syndromes                                                                                                                              |
| 3                                                                                                             | Patients with psychiatric symptoms and syndromes and other autoimmune diseases, i.e., lupus erythematosus, Hashimoto's thyroiditis, Sjögren's syndrome, and autoantibody-associated vasculitis. |
| 4                                                                                                             | Patients with mainly psychiatric symptoms also suffering from seizures                                                                                                                          |
| 5                                                                                                             | Patients with mainly psychiatric symptoms also suffering from movement disorders                                                                                                                |
| 6                                                                                                             | Patients with mainly psychiatric symptoms also suffering from disturbances of consciousness and/or cognition                                                                                    |
| 7                                                                                                             | Patients with mainly psychiatric symptoms also suffering from fever                                                                                                                             |
| 8                                                                                                             | Patients with mainly psychiatric symptoms also suffering from fluctuating psychiatric symptoms                                                                                                  |
| 9                                                                                                             | Patients with mainly psychiatric symptoms also suffering from headaches                                                                                                                         |
| 10                                                                                                            | Patients with mainly psychiatric symptoms also suffering from recently discovered tumors                                                                                                        |
| 11                                                                                                            | Patients with mainly psychiatric symptoms also suffering from neurological deficits                                                                                                             |
| 12                                                                                                            | Patients with mainly psychiatric symptoms also suffering from speech and language disorders                                                                                                     |
| 13                                                                                                            | Patients with mainly psychiatric symptoms also suffering from treatment resistance to standard psychopharmacological therapy                                                                    |
| <b>Table S1B: Registration form for the outpatient clinic for autoantibody-mediated psychiatric disorders</b> |                                                                                                                                                                                                 |
| Please answer these questions and bring this form with you to your first appointment with us:                 |                                                                                                                                                                                                 |
| <i>A. General</i>                                                                                             |                                                                                                                                                                                                 |
| 1                                                                                                             | Why do you wish to have us examine you?                                                                                                                                                         |
| 2                                                                                                             | What is your preliminary working diagnosis?                                                                                                                                                     |
| 3                                                                                                             | What is your name, and when were you born?                                                                                                                                                      |
| 4                                                                                                             | What is your telephone number and address?                                                                                                                                                      |
| <i>B. Special questions</i>                                                                                   |                                                                                                                                                                                                 |
| 1                                                                                                             | Please describe your primary symptoms and/or problem.                                                                                                                                           |
| 2                                                                                                             | Have you had any preliminary tests, if so, which, and with what results?                                                                                                                        |
| 3                                                                                                             | If available, please bring a written report and CD of your MRI exam (e.g., magnetic resonance imaging of your head).                                                                            |
| 4                                                                                                             | Please bring a written report of your nerve fluid findings, if available.                                                                                                                       |
| 5                                                                                                             | Please bring, if available, a written report of your brainwave findings (electroencephalography)                                                                                                |
| 6                                                                                                             | What previous treatments have you undergone?                                                                                                                                                    |
| 7                                                                                                             | What medications have you taken in the past, what medications are you currently taking?                                                                                                         |
| 8                                                                                                             | What illnesses do you have, previous diagnoses, etc.?                                                                                                                                           |
